# Supplementary material for: Development of a new Schiff-base semiconducting material for thin film active device and analysis of its charge transport mechanism
Source: Springer Nature journal article supplement (doi:10.1007/s10853-016-0185-0), 2016-07-11
Supplement: MOESM1 [file 10358814]

Development of a new Schiff-base semiconducting material for thin film active device and analysis of its charge transport mechanism

Shibashis Halder,a Mrinmay Das,b Koushik Ghosh,a Arka Dey,b Bibhuti Bhushan Show,a Partha Pratim Ray*,b and Partha Roy*,a

a Department of Chemistry, Jadavpur University, Jadavpur, Kolkata-700 032, India. Tel: +91-3324572970; Fax: +91-3324146414;

E-mail: proy@chemistry.jdvu.ac.in

b Department of Physics, Jadavpur University, Jadavpur, Kolkata-700 032, India. Tel: +91-9475237259; Fax: +91-3324138917;

E-mail: partha@phys.jdvu.ac.in

**Scheme s1**: Synthesis of **BQB**


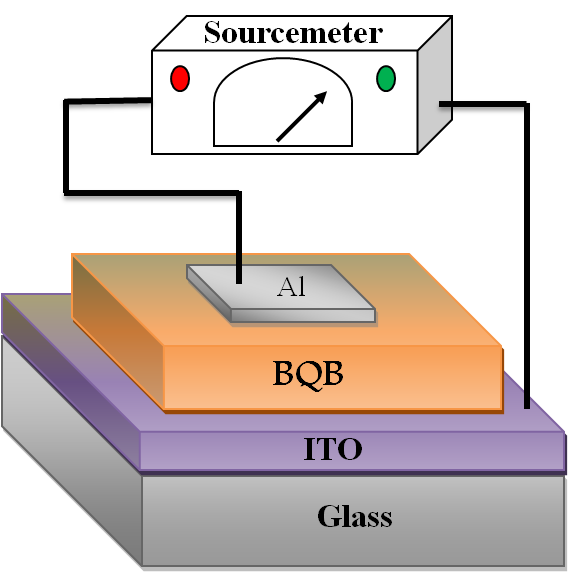


**Fig. s1**: Schematic diagram of the device interfaced with sourcemeter.


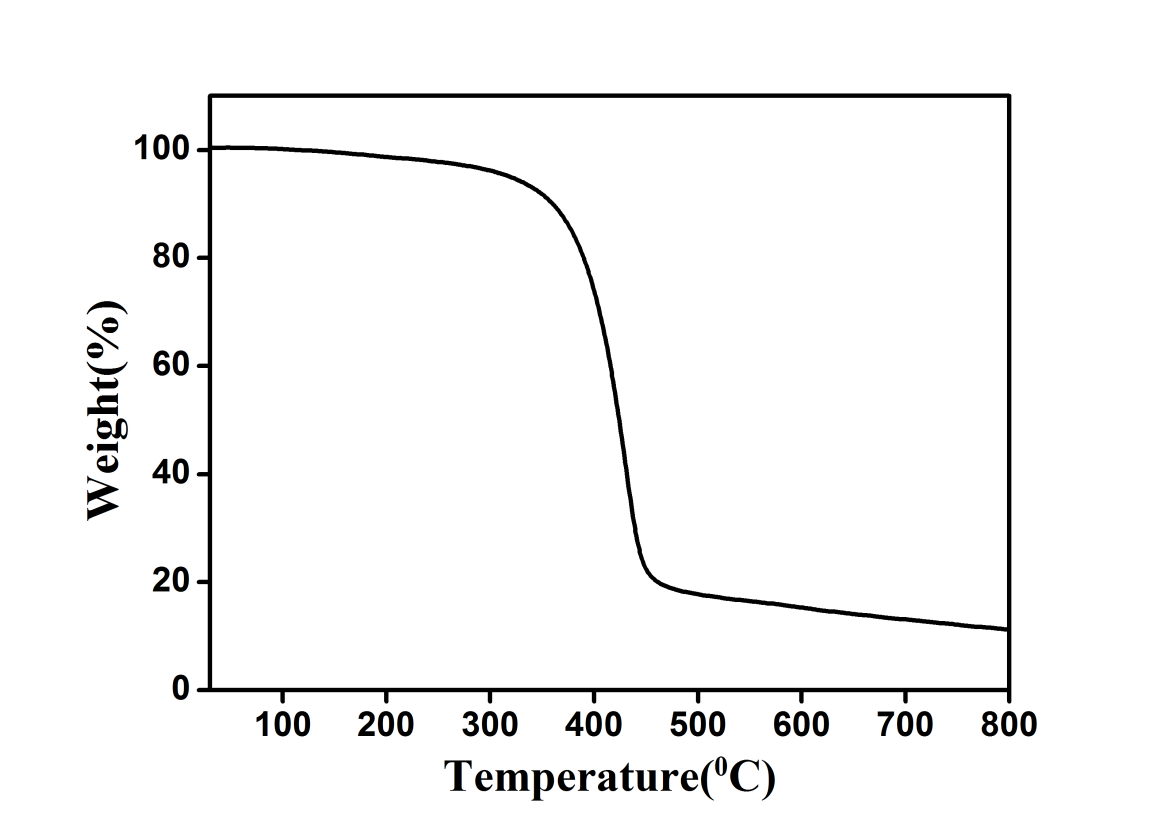


**Fig. s2**: TGA curve of **BQB**


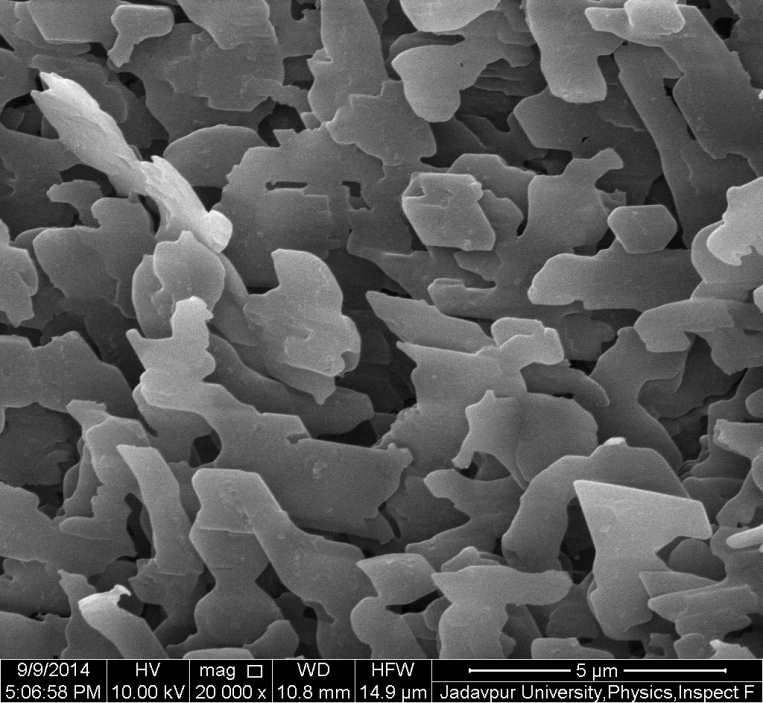


**Fig. s3:** SEM image of the BQB


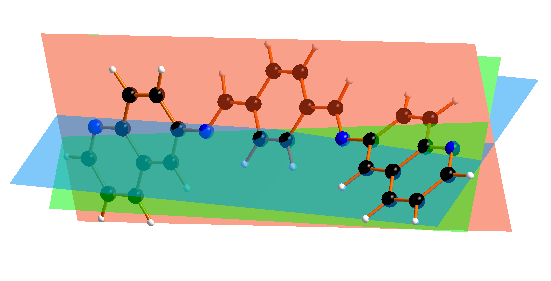


**Fig. s4**: A perspective view of the optimized structure of BQB showing that the two quinoline moieties reside at different planes compare to central six membered ring.


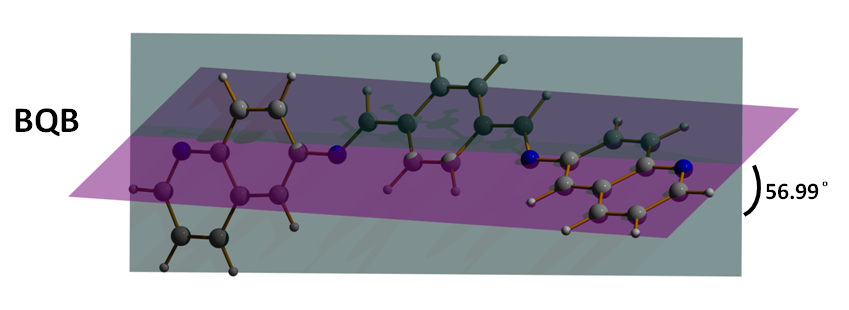


**Fig. s5**: Optimized structure obtained from DFT calculation shows that the entire molecule is not planar at all.


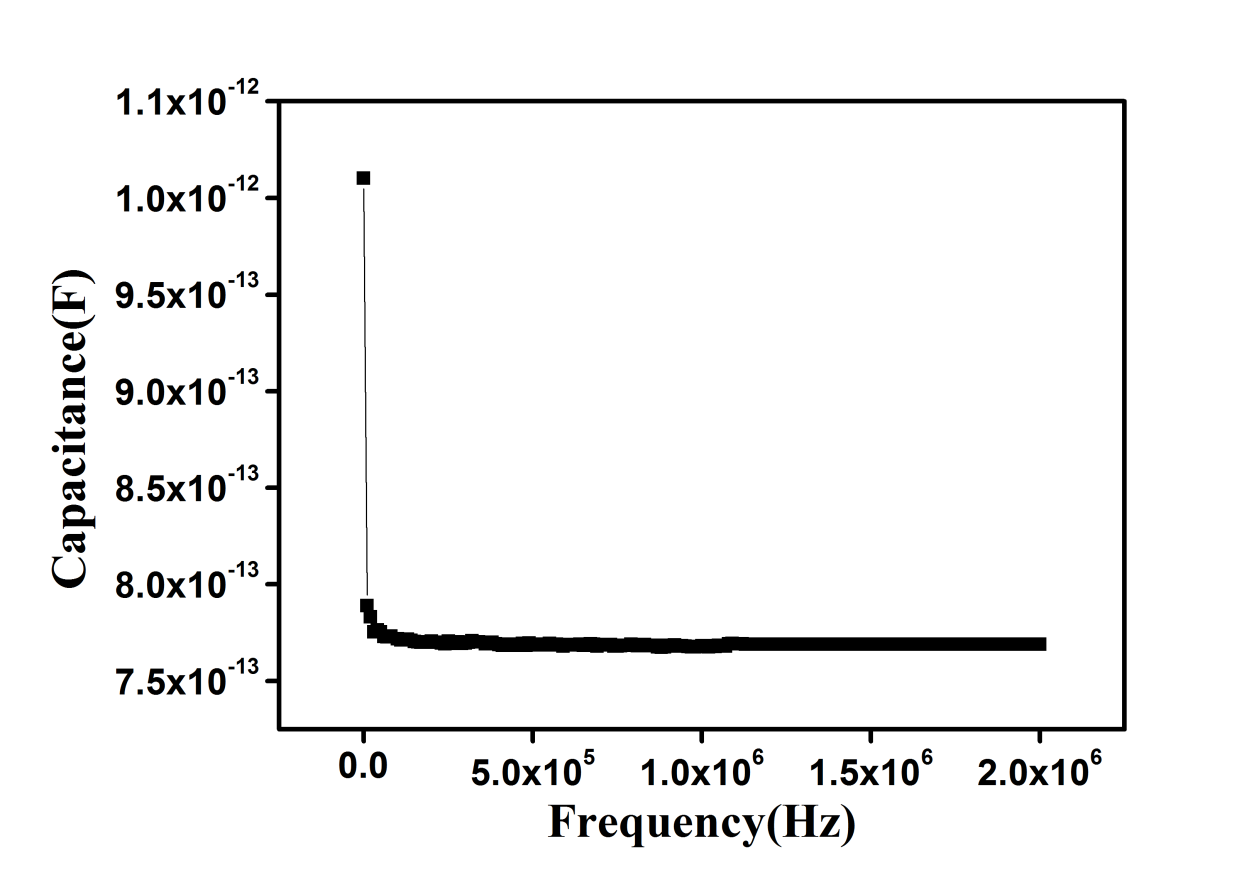


**Fig. s6.** Capacitance vs frequency graph for BQB at constant bias potential

Table s1: Selected bond lengths and bond angles of **BQB** from its optimized geometry

| Bond | Bond Length (Å) |
| --- | --- |
| C1- C2 | 1.3937 |
| C1- C6 | 1.4077 |
| C1- C5 | 2.4309 |
| C1- C3 | 2.4322 |
| C1- C13 | 2.4800 |
| C2- C1 | 1.3937 |
| C2- C3 | 1.4078 |
| C2- C4 | 2.4309 |
| C2- C6 | 2.4322 |
| C2- C11 | 2.4800 |
| C3- C2 | 1.4078 |
| C3- C4 | 1.4135 |
| C3- C11 | 1.4628 |
| C3- N16 | 2.4144 |
| C3- C5 | 2.4319 |
| C3- C1 | 2.4322 |
| C4- C5 | 1.3874 |
| C4- C3 | 1.4135 |
| C4- C2 | 2.4309 |
| C4- C6 | 2.4319 |
| C5- C4 | 1.3874 |
| C5- C6 | 1.4136 |
| C5- C1 | 2.4309 |
| C5- C3 | 2.4319 |
| C6- C1 | 1.4077 |
| C6- C5 | 1.4136 |
| C6- C13 | 1.4628 |
| C6- N15 | 2.4144 |
| C6- C4 | 2.4319 |
| C6- C2 | 2.4322 |
| C11- N16 | 1.2929 |
| C11- C3 | 1.4628 |
| C11- C32 | 2.3751 |
| C11- C2 | 2.4800 |
| C13- N15 | 1.2929 |
| C13- C6 | 1.4628 |
| C13- C17 | 2.3751 |
| C13- C1 | 2.4800 |
| N15- C13 | 1.2929 |
| N15- C17 | 1.4125 |
| N15- C18 | 2.3894 |
| N15- C6 | 2.4144 |
| N16- C11 | 1.2929 |
| N16- C32 | 1.4125 |
| N16- C33 | 2.3896 |
| N16- C3 | 2.4144 |
| C17- C18 | 1.3888 |
| C17- N15 | 1.4125 |
| C17- C19 | 1.4313 |
| C17- C13 | 2.3751 |
| C17- C22 | 2.4400 |
| C17- C20 | 2.4417 |
| C18- C17 | 1.3888 |
| C18- C20 | 1.4170 |
| C18- N15 | 2.3894 |
| C18- C19 | 2.4352 |
| C18- C24 | 2.4596 |
| C19- C22 | 1.3767 |
| C19- C17 | 1.4313 |
| C19- C24 | 2.4314 |
| C19- C18 | 2.4352 |
| C20- C18 | 1.4170 |
| C20- C25 | 1.4239 |
| C20- C24 | 1.4350 |
| C20- C27 | 2.4214 |
| C20- C17 | 2.4417 |
| C20- N47 | 2.4611 |
| C20- C22 | 2.4615 |
| C22- C19 | 1.3767 |
| C22- C24 | 1.4210 |
| C22- N47 | 2.4067 |
| C22- C17 | 2.4400 |
| C22- C20 | 2.4615 |
| C24- N47 | 1.3759 |
| C24- C22 | 1.4210 |
| C24- C20 | 1.4350 |
| C24- C29 | 2.3231 |
| C24- C19 | 2.4314 |
| C24- C25 | 2.4440 |
| C24- C18 | 2.4596 |
| C25- C27 | 1.3794 |
| C25- C20 | 1.4239 |
| C25- C29 | 2.4131 |
| C25- C24 | 2.4440 |
| C27- C25 | 1.3794 |
| C27- C29 | 1.4201 |
| C27- C20 | 2.4214 |
| C27- N47 | 2.4242 |
| C29- N47 | 1.3312 |
| C29- C27 | 1.4201 |
| C29- C24 | 2.3231 |
| C29- C25 | 2.4131 |
| C32- C33 | 1.3888 |
| C32- N16 | 1.4125 |
| C32- C34 | 1.4313 |
| C32- C11 | 2.3751 |
| C32- C37 | 2.4400 |
| C32- C35 | 2.4416 |
| C33- C32 | 1.3888 |
| C33- C35 | 1.4170 |
| C33- N16 | 2.3896 |
| C33- C34 | 2.4352 |
| C33- C39 | 2.4596 |
| C34- C37 | 1.3767 |
| C34- C32 | 1.4313 |
| C34- C39 | 2.4313 |
| C34- C33 | 2.4352 |
| C35- C33 | 1.4170 |
| C35- C40 | 1.4238 |
| C35- C39 | 1.4350 |
| C35- C42 | 2.4215 |
| C35- C32 | 2.4416 |
| C35- N48 | 2.4611 |
| C35- C37 | 2.4615 |
| C37- C34 | 1.3767 |
| C37- C39 | 1.4210 |
| C37- N48 | 2.4067 |
| C37- C32 | 2.4400 |
| C37- C35 | 2.4615 |
| C39- N48 | 1.3759 |
| C39- C37 | 1.4210 |
| C39- C35 | 1.4350 |
| C39- C44 | 2.3231 |
| C39- C34 | 2.4313 |
| C39- C40 | 2.4440 |
| C39- C33 | 2.4596 |
| C40- C42 | 1.3794 |
| C40- C35 | 1.4238 |
| C40- C44 | 2.4133 |
| C40- C39 | 2.4440 |
| C42- C40 | 1.3794 |
| C42- C44 | 1.4203 |
| C42- C35 | 2.4215 |
| C42- N48 | 2.4243 |
| C44- N48 | 1.3311 |
| C44- C42 | 1.4203 |
| C44- C39 | 2.3231 |
| C44- C40 | 2.4133 |
| N47- C29 | 1.3312 |
| N47- C24 | 1.3759 |
| N47- C22 | 2.4067 |
| N47- C27 | 2.4242 |
| N47- C20 | 2.4611 |
| N48- C44 | 1.3311 |
| N48- C39 | 1.3759 |
| N48- C37 | 2.4067 |
| N48- C42 | 2.4243 |
| N48- C35 | 2.4611 |

|  | Bond Angles (°) |
| --- | --- |
| C1-C2-C6 | 120.497 |
| C1-C2-C5 | 89.926 |
| C1-C2-C3 | 29.917 |
| C1-C2-C13 | 151.379 |
| C1-C6-C5 | 30.571 |
| C1-C6-C3 | 90.580 |
| C1-C6-C13 | 30.882 |
| C1-C5-C3 | 60.009 |
| C1-C5-C13 | 61.453 |
| C1-C3-C13 | 121.462 |
| C2-C1-C3 | 120.495 |
| C2-C1-C4 | 89.925 |
| C2-C1-C6 | 29.915 |
| C2-C1-C11 | 151.377 |
| C2-C3-C4 | 30.570 |
| C2-C3-C6 | 90.580 |
| C2-C3-C11 | 30.882 |
| C2-C4-C6 | 60.011 |
| C2-C4-C11 | 61.452 |
| C2-C6-C11 | 121.462 |
| C3-C2-C4 | 118.998 |
| C3-C2-C11 | 119.515 |
| C3-C2-N16 | 146.443 |
| C3-C2-C5 | 89.557 |
| C3-C2-C1 | 29.588 |
| C3-C4-C11 | 121.486 |
| C3-C4-N16 | 94.559 |
| C3-C4-C5 | 29.441 |
| C3-C4-C1 | 89.410 |
| C3-C11-N16 | 26.928 |
| C3-C11-C5 | 150.927 |
| C3-C11-C1 | 149.104 |
| C3-C5-C1 | 59.969 |
| C4-C5-C3 | 120.507 |
| C4-C5-C2 | 90.075 |
| C4-C5-C6 | 30.054 |
| C4-C3-C2 | 30.432 |
| C4-C3-C6 | 90.453 |
| C4-C2-C6 | 60.021 |
| C5-C4-C6 | 120.504 |
| C5-C4-C1 | 90.074 |
| C5-C4-C3 | 30.052 |
| C5-C6-C1 | 30.430 |
| C5-C6-C3 | 90.453 |
| C5-C1-C3 | 60.022 |
| C6-C1-C5 | 118.998 |
| C6-C1-C13 | 119.518 |
| C6-C1-N15 | 146.448 |
| C6-C1-C4 | 89.557 |
| C6-C1-C2 | 29.588 |
| C6-C5-C13 | 121.483 |
| C6-C5-N15 | 94.553 |
| C6-C5-C4 | 29.442 |
| C6-C5-C2 | 89.410 |
| C6-C13-N15 | 26.931 |
| C6-C13-C4 | 150.925 |
| C6-C13-C2 | 149.106 |
| C6-N15-C4 | 123.995 |
| C6-N15-C2 | 176.035 |
| C6-C4-C2 | 59.969 |
| C11-N16-C3 | 122.248 |
| C11-N16-C2 | 151.849 |
| C11-C3-C32 | 152.216 |
| C11-C3-C2 | 29.602 |
| C11-C32-C2 | 177.863 |
| C13-N15-C6 | 122.243 |
| C13-N15-C17 | 30.020 |
| C13-N15-C1 | 151.842 |
| C13-C6-C17 | 152.212 |
| C13-C6-C1 | 29.600 |
| C13-C17-C1 | 177.872 |
| N15-C13-C17 | 122.725 |
| N15-C13-C18 | 148.759 |
| N15-C13-C6 | 30.825 |
| N15-C17-C18 | 31.166 |
| N15-C17-C6 | 153.495 |
| N15-C18-C6 | 168.164 |
| N16-C11-C32 | 122.727 |
| N16-C11-C33 | 148.729 |
| N16-C11-C3 | 30.823 |
| N16-C32-C33 | 31.161 |
| N16-C32-C3 | 153.494 |
| N16-C33-C3 | 168.141 |
| C17-C18-N15 | 117.075 |
| C17-C18-C19 | 119.422 |
| C17-C18-C13 | 140.548 |
| C17-C18-C22 | 90.393 |
| C17-C18-C20 | 29.841 |
| C17-N15-C19 | 123.484 |
| C17-N15-C13 | 27.256 |
| C17-N15-C22 | 152.519 |
| C17-N15-C20 | 146.914 |
| C17-C19-C13 | 98.681 |
| C17-C19-C22 | 29.035 |
| C17-C19-C20 | 89.597 |
| C17-C13-C22 | 126.964 |
| C17-C13-C20 | 165.749 |
| C17-C22-C20 | 60.562 |
| C18-C17-C20 | 120.969 |
| C18-C17-N15 | 31.759 |
| C18-C17-C19 | 30.794 |
| C18-C17-C24 | 90.349 |
| C18-C20-N15 | 152.725 |
| C18-C20-C19 | 90.192 |
| C18-C20-C24 | 30.626 |
| C18-N15-C19 | 62.546 |
| C18-N15-C24 | 122.108 |
| C18-C19-C24 | 59.566 |
| C19-C22-C17 | 120.661 |
| C19-C22-C24 | 30.170 |
| C19-C22-C18 | 90.882 |
| C19-C17-C24 | 90.490 |
| C19-C17-C18 | 29.785 |
| C19-C24-C18 | 60.715 |
| C20-C18-C25 | 123.337 |
| C20-C18-C24 | 119.174 |
| C20-C18-C27 | 153.062 |
| C20-C18-C17 | 29.190 |
| C20-C18-N47 | 147.402 |
| C20-C18-C22 | 88.865 |
| C20-C25-C24 | 117.488 |
| C20-C25-C27 | 29.727 |
| C20-C25-C17 | 152.521 |
| C20-C25-N47 | 89.258 |
| C20-C25-C22 | 147.794 |
| C20-C24-C27 | 87.761 |
| C20-C24-C17 | 89.990 |
| C20-C24-N47 | 28.230 |
| C20-C24-C22 | 30.309 |
| C20-C27-C17 | 177.742 |
| C20-C27-N47 | 59.532 |
| C20-C27-C22 | 118.068 |
| C20-C17-N47 | 118.220 |
| C20-C17-C22 | 59.685 |
| C20-N47-C22 | 58.537 |
| C22-C19-C24 | 120.694 |
| C22-C19-N47 | 150.777 |
| C22-C19-C17 | 30.305 |
| C22-C19-C20 | 90.057 |
| C22-C24-N47 | 30.084 |
| C22-C24-C17 | 90.389 |
| C22-C24-C20 | 30.640 |
| C22-N47-C17 | 120.473 |
| C22-N47-C20 | 60.722 |
| C22-C17-C20 | 59.753 |
| C24-N47-C22 | 118.736 |
| C24-N47-C20 | 122.209 |
| C24-N47-C29 | 30.328 |
| C24-N47-C19 | 147.871 |
| C24-N47-C25 | 91.089 |
| C24-N47-C18 | 152.407 |
| C24-C22-C20 | 119.051 |
| C24-C22-C29 | 149.062 |
| C24-C22-C19 | 29.136 |
| C24-C22-C25 | 150.168 |
| C24-C22-C18 | 88.852 |
| C24-C20-C29 | 91.881 |
| C24-C20-C19 | 89.918 |
| C24-C20-C25 | 31.120 |
| C24-C20-C18 | 30.200 |
| C24-C29-C19 | 178.191 |
| C24-C29-C25 | 60.761 |
| C24-C29-C18 | 122.080 |
| C24-C19-C25 | 121.038 |
| C24-C19-C18 | 59.719 |
| C24-C25-C18 | 61.319 |
| C25-C27-C20 | 119.485 |
| C25-C27-C29 | 30.951 |
| C25-C27-C24 | 88.093 |
| C25-C20-C29 | 88.535 |
| C25-C20-C24 | 31.392 |
| C25-C29-C24 | 57.143 |
| C27-C25-C29 | 119.079 |
| C27-C25-C20 | 30.788 |
| C27-C25-N47 | 91.836 |
| C27-C29-C20 | 88.291 |
| C27-C29-N47 | 27.243 |
| C27-C20-N47 | 61.048 |
| C29-N47-C27 | 123.526 |
| C29-N47-C24 | 31.460 |
| C29-N47-C25 | 93.556 |
| C29-C27-C24 | 92.066 |
| C29-C27-C25 | 29.970 |
| C29-C24-C25 | 62.096 |
| C32-C33-N16 | 117.085 |
| C32-C33-C34 | 119.424 |
| C32-C33-C11 | 140.535 |
| C32-C33-C37 | 90.397 |
| C32-C33-C35 | 29.844 |
| C32-N16-C34 | 123.472 |
| C32-N16-C11 | 27.254 |
| C32-N16-C37 | 152.505 |
| C32-N16-C35 | 146.927 |
| C32-C34-C11 | 98.685 |
| C32-C34-C37 | 29.034 |
| C32-C34-C35 | 89.596 |
| C32-C11-C37 | 126.963 |
| C32-C11-C35 | 165.722 |
| C32-C37-C35 | 60.563 |
| C33-C32-C35 | 120.963 |
| C33-C32-N16 | 31.754 |
| C33-C32-C34 | 30.792 |
| C33-C32-C39 | 90.345 |
| C33-C35-N16 | 152.715 |
| C33-C35-C34 | 90.187 |
| C33-C35-C39 | 30.625 |
| C33-N16-C34 | 62.540 |
| C33-N16-C39 | 122.099 |
| C33-C34-C39 | 59.563 |
| C34-C37-C32 | 120.663 |
| C34-C37-C39 | 30.173 |
| C34-C37-C33 | 90.887 |
| C34-C32-C39 | 90.490 |
| C34-C32-C33 | 29.783 |
| C34-C39-C33 | 60.717 |
| C35-C33-C40 | 123.331 |
| C35-C33-C39 | 119.177 |
| C35-C33-C42 | 153.056 |
| C35-C33-C32 | 29.193 |
| C35-C33-N48 | 147.406 |
| C35-C33-C37 | 88.870 |
| C35-C40-C39 | 117.491 |
| C35-C40-C42 | 29.726 |
| C35-C40-C32 | 152.518 |
| C35-C40-N48 | 89.260 |
| C35-C40-C37 | 147.795 |
| C35-C39-C42 | 87.764 |
| C35-C39-C32 | 89.991 |
| C35-C39-N48 | 28.231 |
| C35-C39-C37 | 30.307 |
| C35-C42-C32 | 177.746 |
| C35-C42-N48 | 59.533 |
| C35-C42-C37 | 118.069 |
| C35-C32-N48 | 118.222 |
| C35-C32-C37 | 59.687 |
| C35-N48-C37 | 58.537 |
| C37-C34-C39 | 120.688 |
| C37-C34-N48 | 150.773 |
| C37-C34-C32 | 30.303 |
| C37-C34-C35 | 90.053 |
| C37-C39-N48 | 30.086 |
| C37-C39-C32 | 90.385 |
| C37-C39-C35 | 30.638 |
| C37-N48-C32 | 120.470 |
| C37-N48-C35 | 60.723 |
| C37-C32-C35 | 59.750 |
| C39-N48-C37 | 118.734 |
| C39-N48-C35 | 122.208 |
| C39-N48-C44 | 30.325 |
| C39-N48-C34 | 147.873 |
| C39-N48-C40 | 91.090 |
| C39-N48-C33 | 152.404 |
| C39-C37-C35 | 119.054 |
| C39-C37-C44 | 149.057 |
| C39-C37-C34 | 29.139 |
| C39-C37-C40 | 150.170 |
| C39-C37-C33 | 88.856 |
| C39-C35-C44 | 91.883 |
| C39-C35-C34 | 89.918 |
| C39-C35-C40 | 31.119 |
| C39-C35-C33 | 30.198 |
| C39-C44-C34 | 178.190 |
| C39-C44-C40 | 60.764 |
| C39-C44-C33 | 122.080 |
| C39-C34-C40 | 121.036 |
| C39-C34-C33 | 59.720 |
| C39-C40-C33 | 61.316 |
| C40-C42-C35 | 119.487 |
| C40-C42-C44 | 30.954 |
| C40-C42-C39 | 88.096 |
| C40-C35-C44 | 88.533 |
| C40-C35-C39 | 31.391 |
| C40-C44-C39 | 57.142 |
| C42-C40-C44 | 119.075 |
| C42-C40-C35 | 30.786 |
| C42-C40-N48 | 91.833 |
| C42-C44-C35 | 88.289 |
| C42-C44-N48 | 27.243 |
| C42-C35-N48 | 61.047 |
| C44-N48-C42 | 123.522 |
| C44-N48-C39 | 31.458 |
| C44-N48-C40 | 93.551 |
| C44-C42-C39 | 92.064 |
| C44-C42-C40 | 29.970 |
| C44-C39-C40 | 62.093 |
| N47-C29-C24 | 118.212 |
| N47-C29-C22 | 149.390 |
| N47-C29-C27 | 29.231 |
| N47-C29-C20 | 88.651 |
| N47-C24-C22 | 31.180 |
| N47-C24-C27 | 88.981 |
| N47-C24-C20 | 29.561 |
| N47-C22-C27 | 120.160 |
| N47-C22-C20 | 60.740 |
| N47-C27-C20 | 59.420 |
| N48-C44-C39 | 118.217 |
| N48-C44-C37 | 149.395 |
| N48-C44-C42 | 29.236 |
| N48-C44-C35 | 88.655 |
| N48-C39-C37 | 31.180 |
| N48-C39-C42 | 88.981 |
| N48-C39-C35 | 29.561 |
| N48-C37-C42 | 120.159 |
| N48-C37-C35 | 60.740 |
| N48-C42-C35 | 59.420 |
